# Supplementary material
Source: Springer Nature journal article supplement (https://www.springermedizin.de/resource/supplementary/13054_2013_3056_MOESM2_ESM.pdf/9712594)

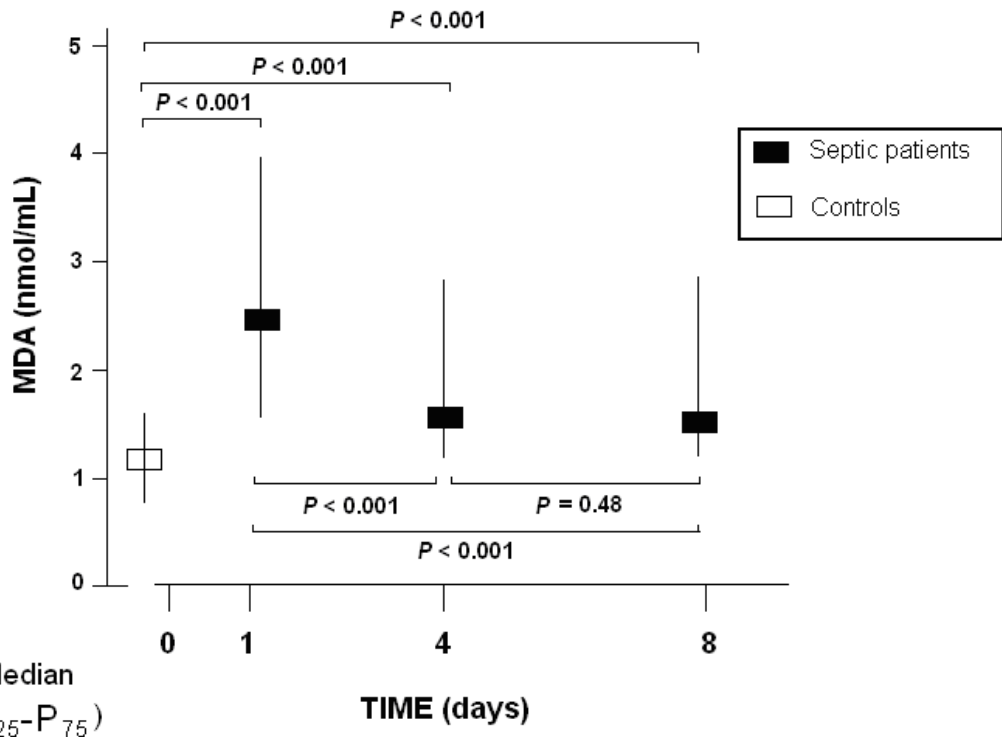

| Group           | 0                            | 1                            | 4                            | 8                            |
|-----------------|------------------------------|------------------------------|------------------------------|------------------------------|
| Septic patients |                              | 2.47<br>(1.64-3.94)<br>n=328 | 1.66<br>(1.11-2.84)<br>n=256 | 1.63<br>(1.14-2.77)<br>n=230 |
| Controls        | 1.11<br>(0.78-1.51)<br>n=100 |                              |                              |                              |

Supplement: MOESM2 [file 9712594]
